# Supplementary material for: Surfactant-free synthesis of ultralong silver nanowires for durable transparent conducting electrodes
Source: Royal Society of Chemistry journal article supplement (doi:10.1039/d0cc01915a), 2020-01-01
Supplement: d0cc01915a1.pdf [file d0cc01915a1.pdf]

## Supporting information

### Surfactant-free synthesis of ultralong silver nanowires for endurable transparent conducting electrodes

Sian-Hong Tseng,<sup>a</sup> Lian-Ming Lyu,<sup>a</sup> Wan-Hua Ho,<sup>a</sup> Kai-Yuan Hsiao<sup>a</sup> and Ming-Yen Lu<sup>\*ab</sup>

<sup>a</sup> Department of Materials Science and Engineering, National Tsing Hua University, Hsinchu 300, Taiwan.

<sup>b</sup> High Entropy Materials Center, National Tsing Hua University, Hsinchu 300, Taiwan

E-mail: mylu@mx.nthu.edu.tw

### Experimental methods

#### *Synthesis of AgNWs*

According to the galvanic replacement reaction, AgNO<sub>3</sub> can be reduced by V in subsequent equation:

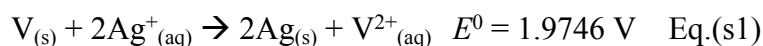

In the present study, 1.70 mg of AgNO<sub>3</sub> powder and 10 mL of DI water were mixed for 1.0 mM AgNO<sub>3</sub> aqueous solution. Subsequently, an appropriately sized (0.5 cm x 0.5 cm x 0.0127 cm) vanadium foil was immersed in the AgNO<sub>3</sub> aqueous solution and kept for 4 hours at different temperatures, a large number of AgNWs were produced in the solution subsequently.

#### *Growth of MoS<sub>2</sub> Films*

A large-area MoS<sub>2</sub> film was grown using pyrolysis. A 3.0 wt% precursor solution contains 0.29 g of (NH<sub>4</sub>)<sub>2</sub>MoS<sub>4</sub> powder and 10 mL of dimethylformamide (DMF) were

mixed. The precursor solution was ultrasonicated for several hours to dissolve the powder. Spin-coating was then adopted to deposit the precursor onto the SiO<sub>2</sub> substrate. The deposited film was placed in a vacuum furnace for pyrolysis. During the heating, the pressure was maintained at 1.8 Torr, and 100 sccm of forming gas was purged into the furnace. The deposited film was heated to 450°C with a rate of 15°C/min, and kept at 450°C for 30 min.

#### *Fabrication of Transparent flexible device Arrays*

The MoS<sub>2</sub> film on SiO<sub>2</sub> was spin-coated with PMMA. After baking at 120 °C for 15 min, the sample was then immersed in 2 M NaOH solution for few min, the PMMA/MoS<sub>2</sub> film was peeled off from the SiO<sub>2</sub>. The delaminated PMMA/MoS<sub>2</sub> film was washed few times in DI water to remove the residual chemicals, and then picked up by PET substrate. After drying, the PMMA was removed with acetone.

Then, photolithography was used to define the pattern and positions of the electrodes. Subsequently, the AgNWs were dripped onto the pattern area. After the lift-off process, transparent flexible device arrays with AgNW electrodes were fabricated.

#### *Analysis and measurements*

The present study employed a scanning electron microscope (Hitachi SU-8010) to check the morphologies of Ag nanostructures under different synthesis conditions. The structure and atomic arrangement of AgNWs were examined by using a spherical-aberration-corrected field emission TEM (JEOL JEM-ARM200FTH) at 200 kV. Furthermore, an ultraviolet-visible spectroscopy (AvaSpec-ULS2048) and a high-resolution semiconductor characterization system (Agilent B1500A) were used to assess material transmittance and electrical measurements, respectively.

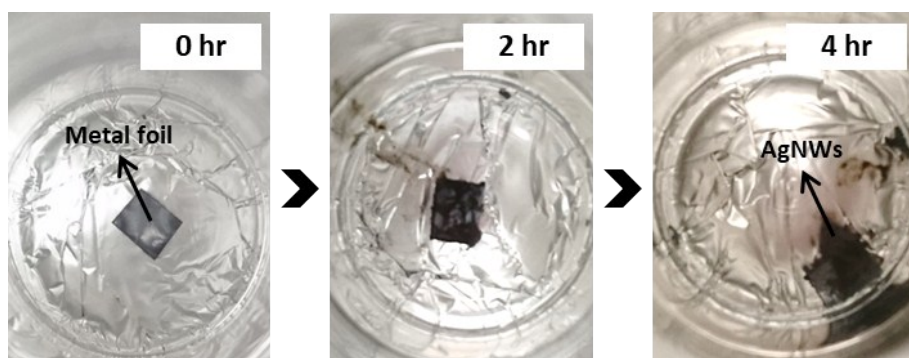

**Figure S1** Growth of silver nanowires (AgNWs) at different reaction times.

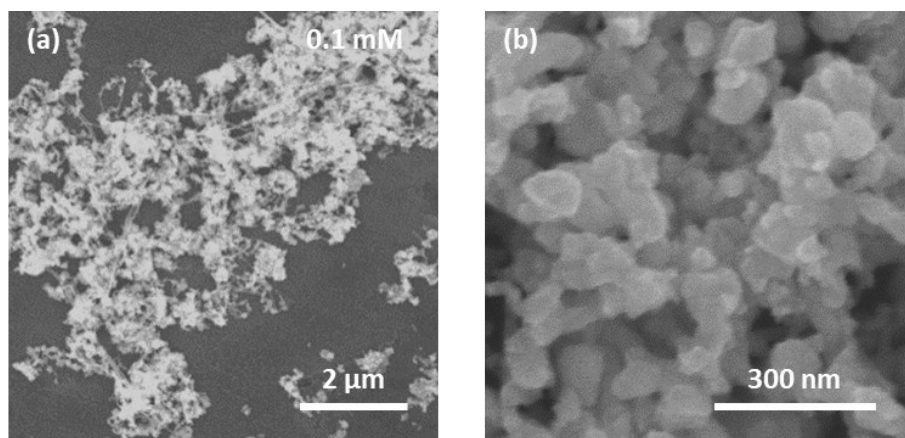

**Figure S2** (a) SEM image of the Ag nanostructures synthesized with a Ag ion concentration of 0.1 mM. (b) High-magnification image of (a).

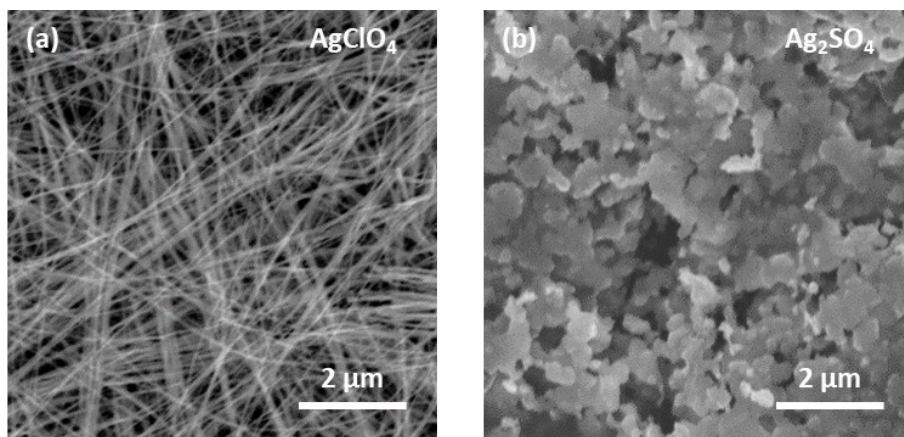

**Figure S3** SEM images of the Ag nanostructures synthesized using (a)  $\text{AgClO}_4$  and (b)  $\text{Ag}_2\text{SO}_4$  as the source.

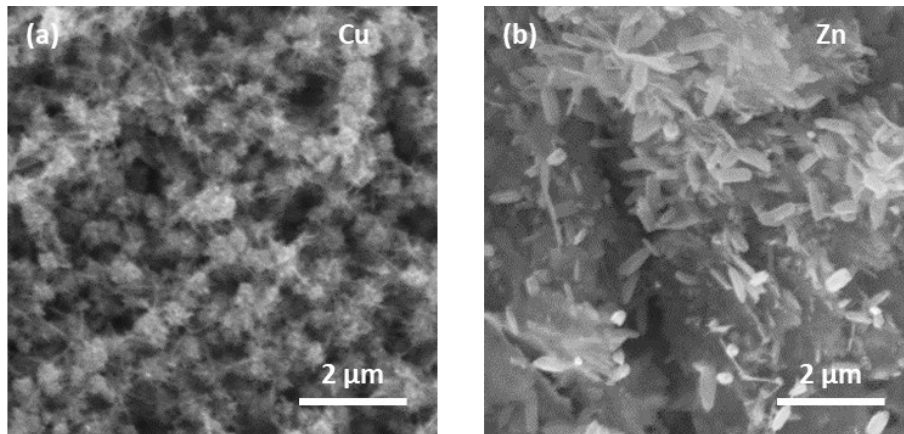

**Figure S4** SEM images of the Ag nanostructures synthesized by using (a) Cu and (b) Zn as reactive metals.

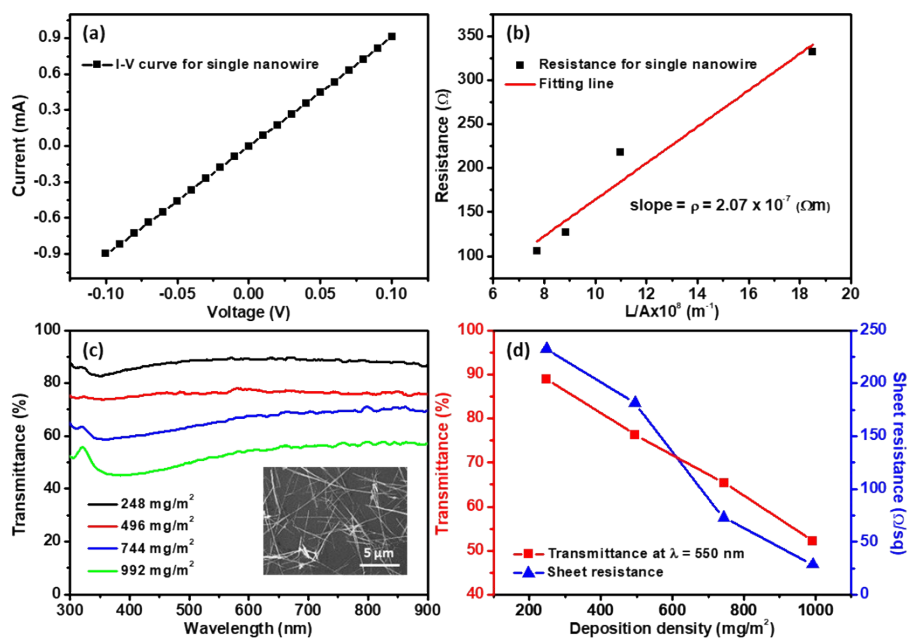

**Figure S5** (a) Current–voltage characteristic (I–V) curve of a single Ag nanowire. (b) Correlation between the resistance and the geometric parameters ( $L/A$ ) of different nanowires. (c) The transmittance for samples with different deposition densities. The insert is the SEM image of the AgNWs electrodes fabricated by the drop casting. (d) The variations of sheet resistance and transmittance for different AgNWs deposition densities.

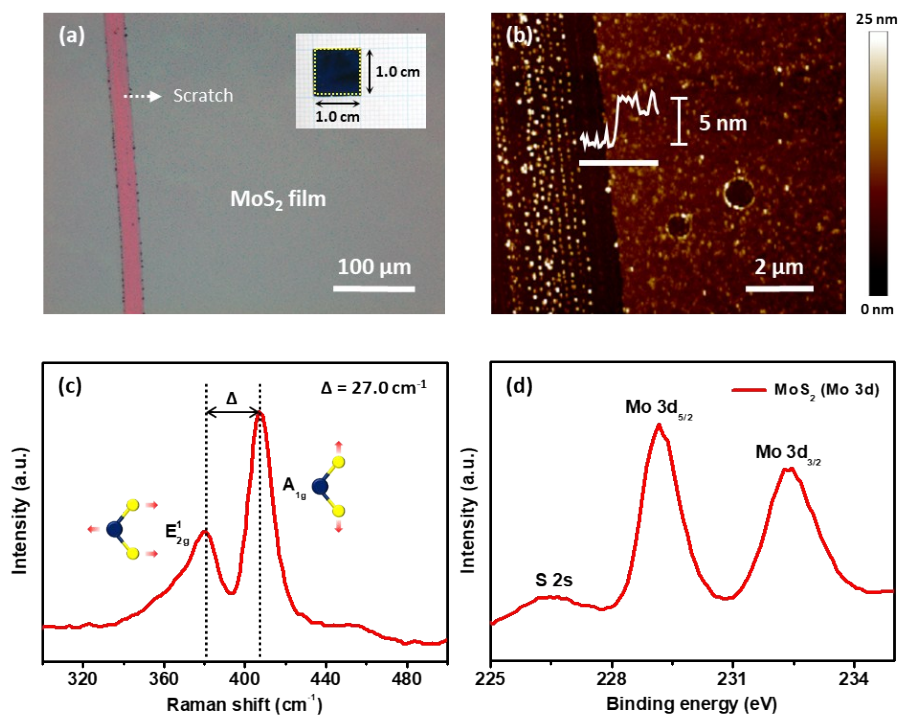

**Figure S6** (a) OM image (The insert is the photograph of the sample), (b) AFM image, (c) Raman spectrum, and (d) X-ray photoelectron spectroscopy spectrum of MoS<sub>2</sub>.

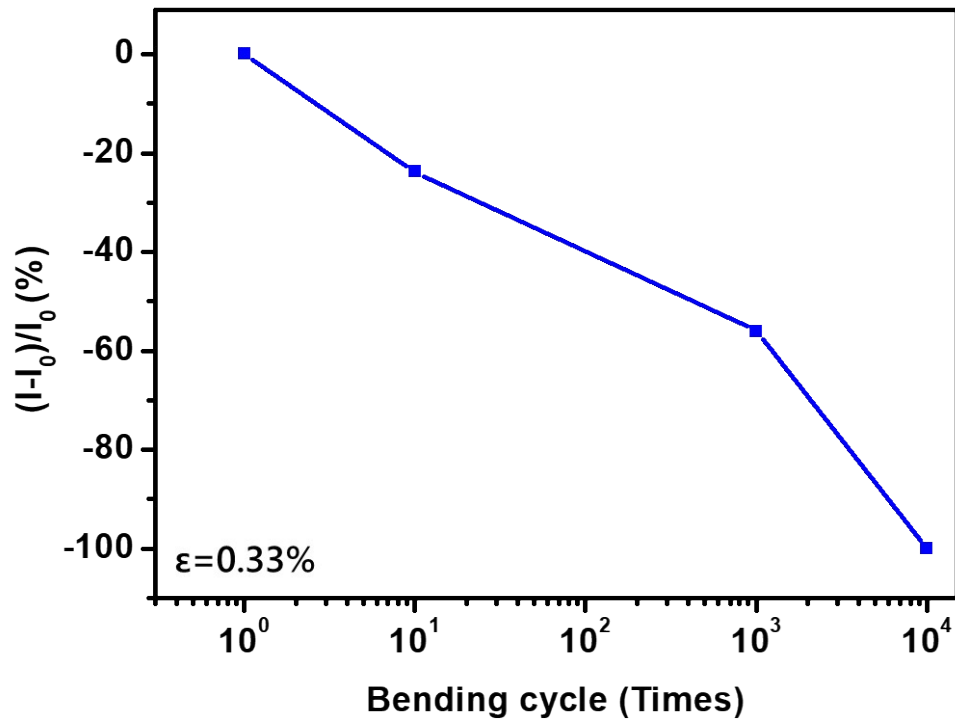

**Figure S7** The changes of electrical property of 1.7 nm MoS<sub>2</sub> device arrays as the function of bending cycles.  $I_0$  and  $I$  represent the current of device before and after bending test, respectively.
